# Supplementary material for: Prevalence and care index of early childhood caries in mainland China: evidence from epidemiological surveys during 1987–2013
Source: PubMed Central journal article supplement (PMC4725361; doi:10.1038/srep18897), 2016-01-13
Supplement: srep18897-s1.pdf [file srep18897-s1.pdf]

**Prevalence and care index of early childhood caries in mainland China: evidence from epidemiological surveys during 1987–2013**

Xiaonan Zhang, Sheng Yang, Zhaoying Liao, Ling Xu, Conghua Li, Huan Zeng, Jinlin Song, Lei Zhang

Corresponding to:

HuanZeng, School of Public Health and Management, Chongqing Medical University, Chongqing, China, No. 1 Yixueyuan Road, Yuzhong District, Chongqing, China; Tel: +86 23 68485008; Fax: +86 23 68485008; E-mail:zenghuan586@aliyun.com

Jinlin Song, College of Stomatology, Chongqing Medical University, Chongqing, China, No.426 Songshibei Road, Yubei District, Chongqing, China; Tel: +86 23 89035721; Fax: +86 23 89035721; E-mail: dentistcq@163.com

**Table S1 | Characteristic of the included 102 studies**

| <b>First author &amp; published year</b> | <b>Survey date</b> | <b>Provinces</b> | <b>Territorial levels</b> | <b>U&amp;R</b> | <b>Investigators</b>                         | <b>Sampling method</b>        | <b>Diagnostic criteria</b>                        | <b>Sample size</b> | <b>Case size</b> | <b>Prevalence (%)</b> | <b>dmft</b> | <b>ft</b> | <b>Care index (%)</b> | <b>Quality score</b> |
|------------------------------------------|--------------------|------------------|---------------------------|----------------|----------------------------------------------|-------------------------------|---------------------------------------------------|--------------------|------------------|-----------------------|-------------|-----------|-----------------------|----------------------|
| <b>Cai et al.2013<sup>1</sup></b>        | 2011               | Shanghai         | city                      | U              | dentists                                     | cluster                       | Guideline for the 3rd National Oral Health Survey | 1259               | 463              | 36.78                 | 1640        | _         | _                     | 8                    |
| <b>Chen et al.2008<sup>2</sup></b>       | 2007               | Hainan           | city                      | U              | experienced child health doctors             | random                        | WHO oral health survey                            | 2354               | 1443             | 61.3                  | 4762        | _         | _                     | 8                    |
| <b>Chen.2009<sup>3</sup></b>             | 2007               | Hainan           | city                      | U              | experienced child health doctors             | random                        | WHO oral health survey                            | 1866               | 1051             | 56.32                 | 5048        | _         | _                     | 8                    |
| <b>Cheng et al. 2011<sup>4</sup></b>     | 2009               | Anhui            | city                      | U              | NA                                           | stratified cluster            | <Child Health care> 3 <sup>rd</sup> edition       | 2993               | 1418             | 47.38                 | _           | _         | _                     | 7                    |
| <b>Chen et al.1992<sup>5</sup></b>       | 1990               | Guangdong        | provincial                | U&R            | health care researchers and medical students | multistage random             | WHO oral health survey                            | 1899               | 1163             | 61.24                 | 11430       | _         | _                     | 9                    |
| <b>Cheng et al.2006<sup>6</sup></b>      | 2005               | Liaoning         | city                      | NA             | trained experienced dentists                 | random                        | Guideline for the 2nd National Oral Health Survey | 5375               | 3832             | 71.29                 | 20878       | 2258      | 10.82                 | 9                    |
| <b>Chen et al.2008<sup>7</sup></b>       | 2006               | Zhejiang         | city                      | U              | experienced doctors                          | cluster random                | WHO oral health survey                            | 1160               | 995              | 85.78                 | 7158        | _         | _                     | 8                    |
| <b>Deng et al.1998<sup>8</sup></b>       | 1995               | Hunan            | city                      | U              | health care doctors                          | cluster random                | NA                                                | 2956               | 1569             | 53.08                 | 7175        | 248       | 3.46                  | 8                    |
| <b>Du et al.2007<sup>9</sup></b>         | 2001               | Guangxi, Hubei   | provincial                | U&R            | trained experienced dentists                 | stratified random             | WHO oral health survey                            | 2014               | 1113             | 55.26                 | 5178        | _         | _                     | 9                    |
| <b>Fan et al.2010<sup>10</sup></b>       | 2008               | Guangdong        | city                      | U&R            | NA                                           | multi-stage stratified random | Guideline for the 3rd National Oral Health Survey | 2880               | 1683             | 58.44                 | 9224        | 375       | 4.07                  | 10                   |

|                                        |      |           |            |     |                         |                               |                                                   |      |      |       |       |     |       |    |
|----------------------------------------|------|-----------|------------|-----|-------------------------|-------------------------------|---------------------------------------------------|------|------|-------|-------|-----|-------|----|
| <b>Feng et al.2004<sup>11</sup></b>    | 2000 | Fujian    | provincial | U&R | trained dental students | stratified cluster            | WHO oral health survey                            | 2132 | 1754 | 82.27 | 11942 | 101 | 0.85  | 9  |
| <b>Feng et al.2013(1)<sup>12</sup></b> | 2011 | Shanghai  | city       | NA  | dentists                | cluster                       | WHO oral health survey                            | 1015 | 526  | 51.82 | 2210  | 317 | 14.34 | 8  |
| <b>Feng et al.2013(2)</b>              | 2003 | Shanghai  | city       | NA  | dentists                | cluster                       | WHO oral health survey                            | 812  | 530  | 65.27 | _     | _   | _     | 8  |
| <b>Gao et al.2009a<sup>13</sup></b>    | 2007 | Anhui     | provincial | U&R | dentists                | multi-stage stratified random | WHO oral health survey                            | 431  | 283  | 65.66 | 1463  | _   | _     | 9  |
| <b>Gao et al.2009b<sup>14</sup></b>    | 2008 | Hebei     | city       | R   | dentists                | cluster random                | WHO oral health survey                            | 2040 | 1002 | 49.12 | 4771  | 9   | 0.19  | 8  |
| <b>Gao et al.2010<sup>15</sup></b>     | 2008 | Xinjiang  | city       | U   | trained doctors         | stratified cluster random     | Guideline for the 2nd National Oral Health Survey | 1483 | 602  | 40.59 | _     | _   | _     | 8  |
| <b>Dong et al.2013<sup>16</sup></b>    | 2012 | Shandong  | city       | U&R | NA                      | cluster                       | National uniform standards of dental caries       | 637  | 254  | 39.87 | _     | _   | _     | 8  |
| <b>Gou et al.2010<sup>17</sup></b>     | 2008 | Chongqing | city       | U   | NA                      | cluster random                | WHO oral health survey                            | 3804 | 1030 | 27.08 | 13543 | _   | _     | 8  |
| <b>Hu et al.1991<sup>18</sup></b>      | 1989 | Henan     | city       | NA  | NA                      | cluster                       | WHO oral health survey                            | 207  | 144  | 69.57 | 572   | _   | _     | 8  |
| <b>Hu et al.2008<sup>19</sup></b>      | 2007 | Jiangsu   | city       | U   | dentists                | random                        | Guideline for the 2nd National Oral Health Survey | 2105 | 1074 | 51.02 | 6049  | 755 | 12.48 | 7  |
| <b>Hu.2013<sup>20</sup></b>            | 2012 | Anhui     | city       | U   | dentists                | random                        | WHO oral health survey                            | 3497 | 1413 | 40.41 | 6010  | 123 | 2.05  | 8  |
| <b>Jiang et al.2002<sup>21</sup></b>   | 1999 | Anhui     | provincial | U&R | NA                      | multi-stage stratified random | Guideline for the 2nd National Oral Health Survey | 2317 | 1523 | 65.73 | 7090  | 185 | 2.61  | 10 |
| <b>Jiang et al.2012<sup>22</sup></b>   | 2011 | Shaanxi   | city       | U   | trained pediatricians   | cluster                       | WHO oral health survey                            | 783  | 117  | 14.94 | _     | _   | _     | 8  |

|                                      |      |          |            |     |                       |                               |                                                   |        |       |       |      |     |       |   |
|--------------------------------------|------|----------|------------|-----|-----------------------|-------------------------------|---------------------------------------------------|--------|-------|-------|------|-----|-------|---|
| <b>Le et al.1992<sup>23</sup></b>    | 1992 | Shanghai | city       | NA  | trained investigators | random                        | WHO oral health survey                            | 1112   | 889   | 79.95 | 5103 | 306 | 6     | 8 |
| <b>Li et al.1991<sup>24</sup></b>    | 1988 | Hubei    | city       | NA  | dentists              | cluster                       | Criteria from <Oral Medicine>                     | 924    | 702   | 75.97 | 3825 | _   | _     | 8 |
| <b>Li et al.1997<sup>25</sup></b>    | 1995 | mainland | China      | U&R | pediatricians         | cluster random                | WHO oral health survey                            | 108850 | 20076 | 18.44 | _    | _   | _     | 9 |
| <b>Li et al.2007<sup>26</sup></b>    | 2006 | Fujian   | city       | NA  | NA                    | random                        | WHO oral health survey                            | 1760   | 950   | 53.98 | 4076 | _   | _     | 8 |
| <b>Li et al.2010a<sup>27</sup></b>   | 2008 | Fujian   | city       | U&R | dentists              | multi-stage stratified random | Guideline for the 3rd National Oral Health Survey | 1523   | 1093  | 71.77 | 7157 | _   | _     | 8 |
| <b>Li et al.2010b<sup>28</sup></b>   | 2008 | Tianjin  | provincial | U&R | NA                    | stratified cluster random     | Guideline for the 3rd National Oral Health Survey | 15940  | 5504  | 34.53 | _    | _   | _     | 8 |
| <b>Li et al.2011<sup>29</sup></b>    | 2009 | Shanghai | city       | U&R | NA                    | multi-stage stratified random | WHO oral health survey                            | 1135   | 664   | 58.5  | 3106 | 322 | 10.37 | 8 |
| <b>Li et al.2012(1)<sup>30</sup></b> | 2008 | Shanghai | provincial | U   | dentists              | cluster random                | Guideline for the 3rd National Oral Health Survey | 950    | 603   | 63.47 | 2812 | 307 | 10.92 | 8 |
| <b>Li et al.2012(2)</b>              | 2009 | Shanghai | provincial | U   | dentists              | cluster random                | Guideline for the 3rd National Oral Health Survey | 950    | 608   | 64    | 2845 | 363 | 12.76 | 8 |
| <b>Li et al.2012(3)</b>              | 2010 | Shanghai | provincial | U   | dentists              | cluster random                | Guideline for the 3rd National Oral Health Survey | 900    | 584   | 64.89 | 2908 | 493 | 16.95 | 8 |
| <b>Li et al.2012(4)</b>              | 2011 | Shanghai | provincial | U   | dentists              | cluster random                | Guideline for the 3rd National Oral Health Survey | 900    | 580   | 64.44 | 2785 | 575 | 20.65 | 8 |
| <b>Li et al.2013a<sup>31</sup></b>   | 2011 | Hebei    | city       | NA  | dentists              | stratified cluster            | WHO oral health survey                            | 1123   | 761   | 67.76 | 5050 | 110 | 2.18  | 8 |
| <b>Li et al.2013b<sup>32</sup></b>   | 2012 | Shandong | city       | U&R | experienced dentists  | stratified random             | Guideline for the 3rd National Oral Health Survey | 426    | 270   | 63.38 | 1416 | 54  | 3.81  | 8 |

|                                       |      |              |            |     |                                     |                               |                                                   |      |      |       |       |     |       |   |
|---------------------------------------|------|--------------|------------|-----|-------------------------------------|-------------------------------|---------------------------------------------------|------|------|-------|-------|-----|-------|---|
| <b>Li.1998<sup>33</sup></b>           | 1996 | Heilongjiang | city       | U&R | NA                                  | random                        | NA                                                | 1100 | 960  | 87.27 | _     | _   | _     | 7 |
| <b>Li.2001<sup>34</sup></b>           | 1988 | Jiangxi      | city       | NA  | dentists                            | stratified cluster random     | Guideline for the 2nd National Oral Health Survey | 561  | 397  | 70.77 | 1661  | _   | _     | 8 |
| <b>Li.2010<sup>35</sup></b>           | 2008 | Gansu        | city       | U&R | health care doctors                 | stratified cluster random     | Guideline for the 3rd National Oral Health Survey | 1200 | 697  | 58.08 | 1890  | 68  | 3.6   | 8 |
| <b>Li.2012<sup>36</sup></b>           | 2011 | Tianjin      | city       | U   | specialists from prevention station | random                        | Guideline for the 3rd National Oral Health Survey | 795  | 524  | 65.91 | 2763  | _   | _     | 9 |
| <b>Liang et al.2010<sup>37</sup></b>  | 2009 | Guangdong    | city       | U   | dentists and health care doctors    | cluster random                | Guideline for the 2nd National Oral Health Survey | 1763 | 829  | 47.02 | 3836  | _   | _     | 7 |
| <b>Liang et al.2012<sup>38</sup></b>  | 2011 | Guangdong    | city       | U   | health care doctors                 | cluster random                | Guideline for the 3rd National Oral Health Survey | 4121 | 2214 | 53.72 | 12364 | _   | _     | 8 |
| <b>Lin et al.2003<sup>39</sup></b>    | 2002 | Chongqing    | provincial | U&R | dentists                            | stratified cluster            | WHO oral health survey                            | 3261 | 1855 | 56.88 | 7411  | 190 | 2.56  | 8 |
| <b>Lin.2013<sup>40</sup></b>          | 2011 | Guangdong    | city       | U   | experienced dentists                | multi-stage stratified random | WHO oral health survey                            | 217  | 107  | 49.31 | 543   | _   | _     | 8 |
| <b>Liu et al.1998<sup>41</sup></b>    | 1996 | Guangdong    | provincial | U&R | dentists                            | multi-stage cluster random    | WHO oral health survey                            | 1587 | 1302 | 82.04 | 9408  | 112 | 1.19  | 9 |
| <b>Liu et al.2005(1)<sup>42</sup></b> | 1990 | Ningxia      | city       | U   | experienced dentists                | random                        | WHO oral health survey                            | 335  | 253  | 75.52 | 924   | 89  | 9.63  | 8 |
| <b>Liu et al.2005(2)</b>              | 1996 | Ningxia      | city       | U   | experienced dentists                | random                        | WHO oral health survey                            | 340  | 199  | 58.53 | 773   | 77  | 9.96  | 8 |
| <b>Liu et al.2005(3)</b>              | 2001 | Ningxia      | city       | U   | experienced dentists                | random                        | WHO oral health survey                            | 413  | 150  | 36.32 | 421   | 46  | 10.93 | 8 |
| <b>Liu et al.2012a<sup>43</sup></b>   | 2012 | Ningxia      | city       | NA  | NA                                  | cluster random                | WHO oral health survey                            | 225  | 157  | 69.78 | 682   | 93  | 13.64 | 8 |

|                                      |      |           |            |     |                              |                                |                                                   |      |      |       |       |      |       |    |
|--------------------------------------|------|-----------|------------|-----|------------------------------|--------------------------------|---------------------------------------------------|------|------|-------|-------|------|-------|----|
| <b>Liu et al.2012b</b> <sup>44</sup> | 2011 | Sichuan   | provincial | U&R | trained investigators        | multi-stage stratified random  | Guideline for the 3rd National Oral Health Survey | 714  | 531  | 74.37 | 2782  | 138  | 4.96  | 8  |
| <b>Liu.2009</b> <sup>45</sup>        | 2008 | Sichuan   | city       | U   | dentists                     | random                         | Guideline for the 2nd National Oral Health Survey | 1160 | 408  | 35.17 | 1124  | _    | _     | 8  |
| <b>Ma.1997</b> <sup>46</sup>         | 1996 | Sichuan   | city       | U   | NA                           | random                         | NA                                                | 4072 | 1751 | 43    | 7037  | _    | _     | 8  |
| <b>Mao et al.1997</b> <sup>47</sup>  | 1995 | Zhejiang  | city       | U&R | trained dentists             | multi-stage stratified cluster | Guideline for the 2nd National Oral Health Survey | 720  | 626  | 86.94 | 4518  | 24   | 0.53  | 9  |
| <b>Mao et al.2011</b> <sup>48</sup>  | 2010 | Sichuan   | city       | R   | NA                           | cluster random                 | Criteria from <Practical internal medicine >      | 6024 | 1710 | 28.39 | _     | _    | _     | 7  |
| <b>Meng et al.2008</b> <sup>49</sup> | 2006 | Beijing   | city       | R   | dentists                     | stratified cluster random      | National uniform standards of dental caries       | 356  | 145  | 40.73 | 487   | _    | _     | 8  |
| <b>NCOH.1998</b> <sup>50</sup>       | 1995 | Beijing   | China      | U&R | trained experienced dentists | multi-stage stratified cluster | Guideline for the 2nd National Oral Health Survey | 2132 | 1611 | 75.56 | 8911  | 1002 | 11.24 | 10 |
| <b>NCOH.1998</b>                     | 1995 | Gansu     | China      | U&R | trained experienced dentists | multi-stage stratified cluster | Guideline for the 2nd National Oral Health Survey | 2132 | 1711 | 80.25 | 10532 | 301  | 2.86  | 10 |
| <b>NCOH.1998</b>                     | 1995 | Guangdong | China      | U&R | trained experienced dentists | multi-stage stratified cluster | Guideline for the 2nd National Oral Health Survey | 2132 | 1638 | 76.83 | 10255 | 246  | 2.4   | 10 |
| <b>NCOH.1998</b>                     | 1995 | Hubei     | China      | U&R | trained experienced dentists | multi-stage stratified cluster | Guideline for the 2nd National Oral Health Survey | 2132 | 1476 | 69.23 | 7765  | 172  | 2.22  | 10 |
| <b>NCOH.1998</b>                     | 1995 | Liaoning  | China      | U&R | trained experienced dentists | multi-stage stratified cluster | Guideline for the 2nd National Oral Health Survey | 2132 | 1908 | 89.49 | 14434 | 211  | 1.46  | 10 |
| <b>NCOH.1998</b>                     | 1995 | Shandong  | China      | U&R | trained experienced dentists | multi-stage stratified cluster | Guideline for the 2nd National Oral Health Survey | 2132 | 1607 | 75.38 | 8144  | 118  | 1.45  | 10 |
| <b>NCOH.1998</b>                     | 1995 | Shanghai  | China      | U&R | trained experienced dentists | multi-stage stratified cluster | Guideline for the 2nd National Oral Health Survey | 2132 | 1669 | 78.28 | 10149 | 895  | 8.82  | 10 |

|                               |      |           |       |     |                              |                                |                                                   |      |      |       |       |     |      |    |
|-------------------------------|------|-----------|-------|-----|------------------------------|--------------------------------|---------------------------------------------------|------|------|-------|-------|-----|------|----|
| <b>NCOH.1998</b>              | 1995 | Sichuan   | China | U&R | trained experienced dentists | multi-stage stratified cluster | Guideline for the 2nd National Oral Health Survey | 2132 | 1292 | 60.6  | 5768  | 420 | 7.28 | 10 |
| <b>NCOH.1998</b>              | 1995 | Tianjin   | China | U&R | trained experienced dentists | multi-stage stratified cluster | Guideline for the 2nd National Oral Health Survey | 2132 | 1590 | 74.58 | 7590  | 128 | 1.69 | 10 |
| <b>NCOH.1998</b>              | 1995 | Zhejiang  | China | U&R | trained experienced dentists | multi-stage stratified cluster | Guideline for the 2nd National Oral Health Survey | 2132 | 1836 | 86.12 | 12056 | 136 | 1.13 | 10 |
| <b>NCOH.1998</b>              | 1995 | Yunnan    | China | U&R | trained experienced dentists | multi-stage stratified cluster | Guideline for the 2nd National Oral Health Survey | 2132 | 1615 | 75.75 | 9458  | 415 | 4.39 | 10 |
| <b>NCOH.2009<sup>51</sup></b> | 2005 | Anhui     | China | U&R | trained experienced dentists | multi-stage stratified random  | Guideline for the 3rd National Oral Health Survey | 795  | 510  | 64.15 | 2572  | 40  | 1.56 | 10 |
| <b>NCOH.2009</b>              | 2005 | Beijing   | China | U&R | trained experienced dentists | multi-stage stratified random  | Guideline for the 3rd National Oral Health Survey | 791  | 464  | 58.66 | 2034  | 364 | 17.9 | 10 |
| <b>NCOH.2009</b>              | 2005 | Fujian    | China | U&R | trained experienced dentists | multi-stage stratified random  | Guideline for the 3rd National Oral Health Survey | 790  | 599  | 75.82 | 3926  | 13  | 0.33 | 10 |
| <b>NCOH.2009</b>              | 2005 | Gansu     | China | U&R | trained experienced dentists | multi-stage stratified random  | Guideline for the 3rd National Oral Health Survey | 785  | 438  | 55.8  | 1899  | 59  | 3.11 | 10 |
| <b>NCOH.2009</b>              | 2005 | Guangdong | China | U&R | trained experienced dentists | multi-stage stratified random  | Guideline for the 3rd National Oral Health Survey | 788  | 536  | 68.02 | 3286  | 39  | 1.19 | 10 |
| <b>NCOH.2009</b>              | 2005 | Guangxi   | China | U&R | trained experienced dentists | multi-stage stratified random  | Guideline for the 3rd National Oral Health Survey | 782  | 652  | 83.38 | 4751  | 25  | 0.53 | 10 |
| <b>NCOH.2009</b>              | 2005 | Guizhou   | China | U&R | trained experienced dentists | multi-stage stratified random  | Guideline for the 3rd National Oral Health Survey | 767  | 344  | 44.85 | 1465  | 34  | 2.32 | 10 |
| <b>NCOH.2009</b>              | 2005 | Hainan    | China | U&R | trained experienced dentists | multi-stage stratified random  | Guideline for the 3rd National Oral Health Survey | 758  | 577  | 76.12 | 3698  | 38  | 1.03 | 10 |
| <b>NCOH.2009</b>              | 2005 | Hebei     | China | U&R | trained experienced dentists | multi-stage stratified random  | Guideline for the 3rd National Oral Health Survey | 792  | 547  | 69.07 | 2612  | 90  | 3.45 | 10 |

|                  |      |              |       |     |                              |                               |                                                   |     |     |       |      |     |      |    |
|------------------|------|--------------|-------|-----|------------------------------|-------------------------------|---------------------------------------------------|-----|-----|-------|------|-----|------|----|
| <b>NCOH.2009</b> | 2005 | Henan        | China | U&R | trained experienced dentists | multi-stage stratified random | Guideline for the 3rd National Oral Health Survey | 784 | 465 | 59.31 | 2054 | 66  | 3.21 | 10 |
| <b>NCOH.2009</b> | 2005 | Heilongjiang | China | U&R | trained experienced dentists | multi-stage stratified random | Guideline for the 3rd National Oral Health Survey | 789 | 565 | 71.61 | 3195 | 107 | 3.35 | 10 |
| <b>NCOH.2009</b> | 2005 | Hubei        | China | U&R | trained experienced dentists | multi-stage stratified random | Guideline for the 3rd National Oral Health Survey | 791 | 448 | 56.64 | 1943 | 31  | 1.6  | 10 |
| <b>NCOH.2009</b> | 2005 | Hunan        | China | U&R | trained experienced dentists | multi-stage stratified random | Guideline for the 3rd National Oral Health Survey | 688 | 408 | 59.3  | 1927 | 19  | 0.99 | 10 |
| <b>NCOH.2009</b> | 2005 | Jiangsu      | China | U&R | trained experienced dentists | multi-stage stratified random | Guideline for the 3rd National Oral Health Survey | 792 | 547 | 69.07 | 2760 | 61  | 2.21 | 10 |
| <b>NCOH.2009</b> | 2005 | Jiangxi      | China | U&R | trained experienced dentists | multi-stage stratified random | Guideline for the 3rd National Oral Health Survey | 790 | 495 | 62.66 | 2339 | 16  | 0.68 | 10 |
| <b>NCOH.2009</b> | 2005 | Liaoning     | China | U&R | trained experienced dentists | multi-stage stratified random | Guideline for the 3rd National Oral Health Survey | 791 | 585 | 73.96 | 3419 | 75  | 2.19 | 10 |
| <b>NCOH.2009</b> | 2005 | Ningxia      | China | U&R | trained experienced dentists | multi-stage stratified random | Guideline for the 3rd National Oral Health Survey | 744 | 400 | 53.76 | 1551 | 47  | 3.03 | 10 |
| <b>NCOH.2009</b> | 2005 | Shandong     | China | U&R | trained experienced dentists | multi-stage stratified random | Guideline for the 3rd National Oral Health Survey | 785 | 524 | 66.75 | 2614 | 112 | 4.28 | 10 |
| <b>NCOH.2009</b> | 2005 | Shanxi       | China | U&R | trained experienced dentists | multi-stage stratified random | Guideline for the 3rd National Oral Health Survey | 792 | 513 | 64.77 | 2589 | 55  | 2.12 | 10 |
| <b>NCOH.2009</b> | 2005 | Shaanxi      | China | U&R | trained experienced dentists | multi-stage stratified random | Guideline for the 3rd National Oral Health Survey | 787 | 354 | 44.98 | 1833 | 46  | 2.51 | 10 |
| <b>NCOH.2009</b> | 2005 | Shanghai     | China | U&R | trained experienced dentists | multi-stage stratified random | Guideline for the 3rd National Oral Health Survey | 789 | 566 | 71.74 | 3290 | 254 | 7.72 | 10 |
| <b>NCOH.2009</b> | 2005 | Sichuan      | China | U&R | trained experienced dentists | multi-stage stratified random | Guideline for the 3rd National Oral Health Survey | 780 | 458 | 58.72 | 2158 | 50  | 2.32 | 10 |



|                                       |      |           |       |     |                              |                               |                                                   |      |      |       |      |     |      |    |
|---------------------------------------|------|-----------|-------|-----|------------------------------|-------------------------------|---------------------------------------------------|------|------|-------|------|-----|------|----|
| <b>NCOH.2009</b>                      | 2005 | Tianjin   | China | U&R | trained experienced dentists | multi-stage stratified random | Guideline for the 3rd National Oral Health Survey | 761  | 436  | 57.29 | 1853 | 42  | 2.27 | 10 |
| <b>NCOH.2009</b>                      | 2005 | Xinjiang  | China | U&R | trained experienced dentists | multi-stage stratified random | Guideline for the 3rd National Oral Health Survey | 788  | 529  | 67.13 | 2561 | 41  | 1.6  | 10 |
| <b>NCOH.2009</b>                      | 2005 | Zhejiang  | China | U&R | trained experienced dentists | multi-stage stratified random | Guideline for the 3rd National Oral Health Survey | 788  | 627  | 79.57 | 3813 | 117 | 3.07 | 10 |
| <b>NCOH.2009</b>                      | 2005 | Chongqing | China | U&R | trained experienced dentists | multi-stage stratified random | Guideline for the 3rd National Oral Health Survey | 748  | 480  | 64.17 | 2663 | 13  | 0.49 | 10 |
| <b>NCOH.2009</b>                      | 2005 | Yunnan    | China | U&R | trained experienced dentists | multi-stage stratified random | Guideline for the 3rd National Oral Health Survey | 790  | 504  | 63.8  | 2912 | 57  | 1.96 | 10 |
| <b>NCOH.2009</b>                      | 2005 | Neimenggu | China | U&R | trained experienced dentists | multi-stage stratified random | Guideline for the 3rd National Oral Health Survey | 780  | 576  | 73.85 | 3204 | 172 | 5.37 | 10 |
| <b>NCOH.2009</b>                      | 2005 | Jilin     | China | U&R | trained experienced dentists | multi-stage stratified random | Guideline for the 3rd National Oral Health Survey | 773  | 634  | 82.02 | 4286 | 141 | 3.29 | 10 |
| <b>NCOH.2009</b>                      | 2005 | Qinghai   | China | U&R | trained experienced dentists | multi-stage stratified random | Guideline for the 3rd National Oral Health Survey | 787  | 562  | 71.41 | 2594 | 50  | 1.93 | 10 |
| <b>Pei.2008</b> <sup>52</sup>         | 2007 | Henan     | city  | NA  | trained experienced dentists | cluster random                | WHO oral health survey                            | 1758 | 1132 | 64.39 | 4683 | _   | _    | 8  |
| <b>Peng et al.2001a</b> <sup>53</sup> | 1997 | Guangdong | city  | NA  | experienced dentists         | multi-stage cluster random    | NA                                                | 639  | 508  | 79.5  | 3093 | _   | _    | 8  |
| <b>Peng et al.2001b</b> <sup>54</sup> | 1998 | Zhejiang  | city  | U   | NA                           | stratified cluster random     | WHO oral health survey                            | 832  | 449  | 53.97 | 1761 | _   | _    | 7  |
| <b>Peng.2001</b> <sup>55</sup>        | 1998 | Zhejiang  | city  | U   | dentists                     | random                        | WHO oral health survey                            | 985  | 529  | 53.71 | 2098 | 15  | 0.71 | 8  |
| <b>Quan.1992</b> <sup>56</sup>        | 1990 | Hubei     | city  | U   | NA                           | random                        | NA                                                | 598  | 329  | 55.02 | 1891 | _   | _    | 9  |

|                                      |      |              |            |     |                              |                            |                                                   |      |      |       |      |     |       |   |
|--------------------------------------|------|--------------|------------|-----|------------------------------|----------------------------|---------------------------------------------------|------|------|-------|------|-----|-------|---|
| <b>Sheng.2008<sup>57</sup></b>       | 2007 | Liaoning     | city       | NA  | dentists                     | cluster                    | WHO oral health survey                            | 604  | 384  | 63.58 | 1927 | 290 | 15.05 | 8 |
| <b>Shu et al.2000<sup>58</sup></b>   | 1996 | Shanghai     | city       | NA  | NA                           | cluster                    | Guideline for the 2nd National Oral Health Survey | 343  | 144  | 41.98 | 772  | 117 | 15.16 | 8 |
| <b>Song et al.2011<sup>59</sup></b>  | 2008 | Shaanxi      | city       | NA  | experienced dentists         | cluster random             | WHO oral health survey                            | 412  | 173  | 41.99 | _    | _   | _     | 8 |
| <b>Tao.2010<sup>60</sup></b>         | 2007 | Anhui        | city       | U   | trained health care doctors  | stratified cluster random  | Guideline for the 3rd National Oral Health Survey | 1310 | 658  | 50.23 | 2936 | 156 | 5.31  | 8 |
| <b>Tian et al.2009<sup>61</sup></b>  | 2005 | Hainan       | provincial | U&R | trained experienced dentists | multiple stratified random | WHO oral health survey                            | 720  | 568  | 78.89 | 3506 | 38  | 1.08  | 9 |
| <b>Wang et al.1994<sup>62</sup></b>  | 1990 | Beijing      | provincial | U   | NA                           | random                     | NA                                                | 241  | 207  | 85.89 | 1334 | 82  | 6.15  | 8 |
| <b>Wang et al.1994<sup>62</sup></b>  | 1990 | Sichuan      | provincial | R   | NA                           | random                     | NA                                                | 236  | 172  | 72.88 | 977  | 2   | 0.2   | 8 |
| <b>Wang et al.1998a<sup>63</sup></b> | 1996 | Shandong     | city       | U   | trained doctors              | stratified random          | WHO oral health survey                            | 3294 | 2095 | 63.6  | 9707 | 141 | 1.45  | 8 |
| <b>Wang et al.1998b<sup>64</sup></b> | 1996 | Shanghai     | city       | U   | dentists                     | cluster                    | NA                                                | 848  | 602  | 70.99 | _    | _   | _     | 8 |
| <b>Wang et al.2001<sup>65</sup></b>  | 1999 | Shandong     | city       | U   | doctors                      | cluster random             | WHO oral health survey                            | 1185 | 536  | 45.23 | _    | _   | _     | 8 |
| <b>Wang et al.2003<sup>66</sup></b>  | 2000 | Heilongjiang | city       | U   | experienced dentists         | random                     | Guideline for the 1st National Oral Health Survey | 568  | 349  | 61.44 | 1832 | _   | _     | 7 |
| <b>Wang et al.2010<sup>67</sup></b>  | 2008 | Zhejiang     | city       | NA  | trained doctors              | cluster random             | WHO oral health survey                            | 928  | 484  | 52.16 | 2255 | 224 | 9.93  | 8 |
| <b>Wang et al.2011a<sup>68</sup></b> | 2008 | Hebei        | city       | U   | Health care doctors          | random                     | WHO oral health survey                            | 6162 | 3650 | 59.23 | 7275 | _   | _     | 8 |

|                                       |      |          |            |     |                       |                                       |                                                                              |      |      |       |       |     |      |   |
|---------------------------------------|------|----------|------------|-----|-----------------------|---------------------------------------|------------------------------------------------------------------------------|------|------|-------|-------|-----|------|---|
| <b>Wang et al.2011b</b> <sup>69</sup> | 2009 | Zhejiang | city       | U&R | trained dentists      | cluster random                        | Guideline for the 3rd National Oral Health Survey                            | 1136 | 773  | 68.05 | 4099  | _   | _    | 8 |
| <b>Wang.1989</b> <sup>70</sup>        | 1988 | Henan    | city       | U   | NA                    | stratified cluster                    | criteria from <Oral Medicine>                                                | 565  | 437  | 77.35 | 2211  | 45  | 2.04 | 8 |
| <b>Wei et al.2013</b> <sup>71</sup>   | 2012 | Hubei    | city       | U&R | dentists              | random                                | WHO oral health survey                                                       | 435  | 135  | 31.03 | 526   | _   | _    | 8 |
| <b>Wen et al.2013</b> <sup>72</sup>   | 2011 | Fujian   | city       | U&R | trained doctors       | stratified cluster random             | WHO oral health survey                                                       | 720  | 575  | 79.86 | 3774  | _   | _    | 8 |
| <b>Wu et al.1995</b> <sup>73</sup>    | 1993 | Jiangsu  | city       | NA  | NA                    | stratified random                     | criteria from “National Survey of Student Physical Health Research Handbook” | 4172 | 2700 | 64.72 | 10496 | 824 | 7.85 | 8 |
| <b>Wu et al.2005</b> <sup>74</sup>    | 2002 | Guangxi  | city       | NA  | trained investigators | multi-stage stratified cluster random | WHO oral health survey                                                       | 563  | 331  | 58.79 | 1545  | _   | _    | 8 |
| <b>Xiao.2014</b> <sup>75</sup>        | 2013 | Shanxi   | city       | U   | experienced dentists  | multistage stratified cluster random  | Guideline for the 3rd National Oral Health Survey                            | 217  | 107  | 49.31 | 543   | _   | _    | 8 |
| <b>Xie et al. 2001</b> <sup>76</sup>  | 2000 | Anhui    | city       | U   | NA                    | stratified random                     | WHO oral health survey                                                       | 567  | 244  | 43.03 | 927   | 17  | 1.83 | 8 |
| <b>Xing et al.1990</b> <sup>77</sup>  | 1987 | Zhejiang | provincial | U&R | dentists              | random                                | NA                                                                           | 1088 | 881  | 80.97 | _     | _   | _    | 9 |
| <b>Xu et al.2010</b> <sup>78</sup>    | 2009 | Xinjiang | city       | NA  | trained doctors       | random                                | criteria from Dental Prevention Center                                       | 1101 | 190  | 17.26 | _     | _   | _    | 8 |
| <b>Xu et al.2013</b> <sup>79</sup>    | 2010 | Shanghai | provincial | U   | experienced dentists  | multi-stage stratified random         | AADA                                                                         | 576  | 106  | 18.4  | 351   | 0   | 0    | 7 |

|                                      |      |           |            |     |                      |                               |                                                   |      |      |       |      |     |       |    |
|--------------------------------------|------|-----------|------------|-----|----------------------|-------------------------------|---------------------------------------------------|------|------|-------|------|-----|-------|----|
| <b>Cao et al.2010<sup>80</sup></b>   | 2010 | Shanghai  | provincial | U   | experienced dentists | multi-stage stratified random | AADA                                              | 600  | 294  | 49    | 1301 | 51  | 3.92  | 8  |
| <b>Xu.1995<sup>81</sup></b>          | 1994 | Guangdong | city       | NA  | dentists             | random                        | WHO oral health survey                            | 1051 | 907  | 86.3  | 3434 | _   | _     | 7  |
| <b>Xu.1998<sup>82</sup></b>          | 1994 | Fujian    | city       | NA  | NA                   | random                        | NA                                                | 1125 | 968  | 86.04 | 6075 | _   | _     | 7  |
| <b>Xu.2012<sup>83</sup></b>          | 2010 | Shanghai  | provincial | U&R | dentists             | multistage stratified random  | WHO oral health survey                            | 1062 | 603  | 56.78 | 2907 | 330 | 11.35 | 10 |
| <b>Xu.2013<sup>84</sup></b>          | 2011 | Sichuan   | city       | U&R | trained dentists     | multistage stratified random  | Guideline for the 3rd National Oral Health Survey | 756  | 415  | 54.89 | 2419 | _   | _     | 9  |
| <b>Ye.2010<sup>85</sup></b>          | 2008 | Guangxi   | city       | U   | dentists             | random                        | NA                                                | 1755 | 1335 | 76.07 | _    | _   | _     | 8  |
| <b>Ye et al.2003(1)<sup>86</sup></b> | 1991 | Hubei     | city       | U   | dentists             | cluster                       | WHO oral health survey                            | 661  | 520  | 78.67 | 2063 | _   | _     | 8  |
| <b>Ye et al.2003(2)</b>              | 1992 | Hubei     | city       | U   | dentists             | cluster                       | WHO oral health survey                            | 414  | 315  | 76.09 | 1689 | _   | _     | 8  |
| <b>Ye et al.2003(3)</b>              | 1993 | Hubei     | city       | U   | dentists             | cluster                       | WHO oral health survey                            | 574  | 433  | 75.44 | 2440 | _   | _     | 8  |
| <b>Ye et al.2003(4)</b>              | 1994 | Hubei     | city       | U   | dentists             | cluster                       | WHO oral health survey                            | 693  | 516  | 74.46 | 2966 | _   | _     | 8  |
| <b>Ye et al.2003(5)</b>              | 1995 | Hubei     | city       | U   | dentists             | cluster                       | WHO oral health survey                            | 400  | 296  | 74    | 1648 | _   | _     | 8  |
| <b>Ye et al.2003(6)</b>              | 1996 | Hubei     | city       | U   | dentists             | cluster                       | WHO oral health survey                            | 398  | 282  | 70.85 | 1576 | _   | _     | 8  |
| <b>Ye et al.2003(7)</b>              | 1997 | Hubei     | city       | U   | dentists             | cluster                       | WHO oral health survey                            | 354  | 239  | 67.51 | 1260 | _   | _     | 8  |

|                                      |      |          |            |     |                                              |                                |                                                   |       |      |       |      |     |      |    |
|--------------------------------------|------|----------|------------|-----|----------------------------------------------|--------------------------------|---------------------------------------------------|-------|------|-------|------|-----|------|----|
| <b>Ye et al.2003(8)</b>              | 1998 | Hubei    | city       | U   | dentists                                     | cluster                        | WHO oral health survey                            | 983   | 624  | 63.48 | 3242 | _   | _    | 8  |
| <b>Ye et al.2003(9)</b>              | 1999 | Hubei    | city       | U   | dentists                                     | cluster                        | WHO oral health survey                            | 558   | 353  | 63.26 | 1713 | _   | _    | 8  |
| <b>Ye et al.2003(10)</b>             | 2000 | Hubei    | city       | U   | dentists                                     | cluster                        | WHO oral health survey                            | 890   | 434  | 48.76 | 2630 | _   | _    | 8  |
| <b>Yu et al.2006<sup>87</sup></b>    | 2004 | Guizhou  | city       | U&R | experienced dentists                         | Multi-stage stratified cluster | Guideline for the 2nd National Oral Health Survey | 1100  | 608  | 55.27 | 2181 | 126 | 5.78 | 10 |
| <b>Yu.2010<sup>88</sup></b>          | 2009 | Zhejiang | city       | U   | experienced dentists                         | random                         | Guideline for the 3rd National Oral Health Survey | 1057  | 511  | 48.34 | 2216 | _   | _    | 8  |
| <b>Zhang et al.2000<sup>89</sup></b> | 1995 | Shanghai | provincial | U   | trained investigators                        | cluster random                 | WHO oral health survey                            | 12202 | 2897 | 23.74 | _    | _   | _    | 8  |
| <b>Zhang et al.2004<sup>90</sup></b> | 2003 | Shanghai | provincial | U&R | health care doctors                          | random                         | WHO oral health survey                            | 1965  | 951  | 48.4  | 4464 | _   | _    | 8  |
| <b>Zhang et al.2005<sup>91</sup></b> | 2000 | Liaoning | city       | NA  | dentists                                     | random                         | WHO oral health survey                            | 3799  | 1414 | 37.22 | 5941 | _   | _    | 8  |
| <b>Zhang et al.2010<sup>92</sup></b> | 2009 | Gansu    | city       | U   | NA                                           | cluster random                 | WHO oral health survey                            | 4170  | 1427 | 34.22 | _    | _   | _    | 8  |
| <b>Zhang et al.2011<sup>93</sup></b> | 2008 | Shaanxi  | city       | U   | experienced dentists and health care doctors | random                         | WHO oral health survey                            | 2626  | 1573 | 59.9  | 5042 | 408 | 8.09 | 8  |
| <b>Zhao et al.2013<sup>94</sup></b>  | 2012 | Liaoning | city       | U   | experienced dentists                         | multi-stage stratified random  | WHO oral health survey                            | 915   | 589  | 64.37 | 2458 | 122 | 4.96 | 9  |
| <b>Zhao.2000<sup>95</sup></b>        | 1999 | Gansu    | city       | U   | NA                                           | random                         | Guideline for the 2nd National Oral Health Survey | 540   | 444  | 82.22 | 2718 | 229 | 8.43 | 8  |

|                                       |      |          |            |     |                              |                                |                                                   |      |      |       |       |      |       |   |
|---------------------------------------|------|----------|------------|-----|------------------------------|--------------------------------|---------------------------------------------------|------|------|-------|-------|------|-------|---|
| <b>Zhao.2001</b> <sup>96</sup>        | 1998 | Gansu    | provincial | U&R | trained experienced dentists | random                         | Guideline for the 2nd National Oral Health Survey | 1222 | 929  | 76.02 | 5302  | _    | _     | 8 |
| <b>Zhong et al.2003</b> <sup>97</sup> | 2001 | Henan    | provincial | U&R | experienced dentists         | multi-stage stratified cluster | WHO oral health survey                            | 2320 | 1326 | 57.16 | 5242  | 122  | 2.33  | 9 |
| <b>Zhong et al.2011</b> <sup>98</sup> | 2010 | Shandong | city       | U   | dentists                     | cluster random                 | NA                                                | 516  | 195  | 37.79 | 814   | 4    | 0.49  | 8 |
| <b>Zhou et al.2004</b> <sup>99</sup>  | 2002 | Beijing  | city       | U   | NA                           | stratified cluster random      | Guideline for the 2nd National Oral Health Survey | 620  | 369  | 59.52 | 1717  | 522  | 30.4  | 8 |
| <b>Zhu.2003</b> <sup>100</sup>        | 1999 | Sichuan  | city       | R   | trained dentists             | random                         | WHO oral health survey                            | 4150 | 1118 | 26.94 | _     | _    | _     | 8 |
| <b>Zhu.2012</b> <sup>101</sup>        | 2011 | Beijing  | city       | U   | experienced dentists         | random                         | Guideline for the 3rd National Oral Health Survey | 7200 | 4874 | 67.69 | 24931 | 3524 | 14.14 | 8 |
| <b>Zuo et al.2011</b> <sup>102</sup>  | 2010 | Xinjiang | city       | NA  | dentists                     | cluster                        | Guideline for the 2nd National Oral Health Survey | 1443 | 892  | 61.82 | 1790  | _    | _     | 8 |

NCOH: National Committee for Oral Health; NA: not available; U: urban; R: rural; WHO: World Health Organization; AADA: American Academy of Pediatric Dentistry; ft: number of filled teeth; dmft: number of decayed, missing and filled teeth; care index: ft/dmft%

**Table S2 | Quality assessment of included 102 studies**

| First author<br>&<br>published<br>year | Survey<br>date | Provinces         | Territorial<br>levels | total | Quality score        |                |                       |                       |                                                 |
|----------------------------------------|----------------|-------------------|-----------------------|-------|----------------------|----------------|-----------------------|-----------------------|-------------------------------------------------|
|                                        |                |                   |                       |       | sample<br>population | sample<br>size | participation<br>rate | outcome<br>assessment | analytical<br>methods<br>to control<br>for bias |
| Cai et al.2013                         | 2011           | Shanghai          | city                  | 8     | 2                    | 0              | 2                     | 2                     | 2                                               |
| Chen et al.2008                        | 2007           | Hainan            | city                  | 8     | 2                    | 0              | 2                     | 2                     | 2                                               |
| Chen.2009                              | 2007           | Hainan            | city                  | 8     | 2                    | 0              | 2                     | 2                     | 2                                               |
| Cheng et al. 2011                      | 2009           | Anhui             | city                  | 7     | 2                    | 0              | 2                     | 2                     | 1                                               |
| Chen et al.1992                        | 1990           | Guangdong         | provincial            | 9     | 2                    | 1              | 2                     | 2                     | 2                                               |
| Cheng et al.2006                       | 2005           | Liaoning          | city                  | 9     | 2                    | 1              | 2                     | 2                     | 2                                               |
| Chen et al.2008                        | 2006           | Zhejiang          | city                  | 8     | 2                    | 0              | 2                     | 2                     | 2                                               |
| Deng et al.1998                        | 1995           | Hunan             | city                  | 8     | 2                    | 0              | 2                     | 2                     | 2                                               |
| Du et al.2007                          | 2001           | Guangxi,<br>Hubei | provincial            | 9     | 2                    | 1              | 2                     | 2                     | 2                                               |
| Fan et al.2010                         | 2008           | Guangdong         | city                  | 10    | 2                    | 2              | 2                     | 2                     | 2                                               |

|                         |           |           |            |    |   |   |   |   |   |
|-------------------------|-----------|-----------|------------|----|---|---|---|---|---|
| <b>Feng et al.2004</b>  | 2000      | Fujian    | provincial | 9  | 2 | 1 | 2 | 2 | 2 |
| <b>Feng et al.2013</b>  | 2011、2003 | Shanghai  | city       | 8  | 2 | 0 | 2 | 2 | 2 |
| <b>Gao et al.2009a</b>  | 2007      | Anhui     | provincial | 9  | 2 | 1 | 2 | 2 | 2 |
| <b>Gao et al.2009b</b>  | 2008      | Hebei     | city       | 8  | 2 | 0 | 2 | 2 | 2 |
| <b>Gao et al.2010</b>   | 2008      | Xinjiang  | city       | 8  | 2 | 0 | 2 | 2 | 2 |
| <b>Dong et al.2013</b>  | 2012      | Shandong  | city       | 8  | 2 | 0 | 2 | 2 | 2 |
| <b>Gou et al.2010</b>   | 2008      | Chongqing | city       | 8  | 2 | 0 | 2 | 2 | 2 |
| <b>Hu et al.1991</b>    | 1989      | Henan     | city       | 8  | 2 | 0 | 2 | 2 | 2 |
| <b>Hu et al.2008</b>    | 2007      | Jiangsu   | city       | 7  | 2 | 0 | 2 | 2 | 1 |
| <b>Hu.2013</b>          | 2012      | Anhui     | city       | 8  | 2 | 0 | 2 | 2 | 2 |
| <b>Jiang et al.2002</b> | 1999      | Anhui     | provincial | 10 | 2 | 2 | 2 | 2 | 2 |
| <b>Jiang et al.2012</b> | 2011      | Shaanxi   | city       | 8  | 2 | 0 | 2 | 2 | 2 |
| <b>Le et al.1992</b>    | 1992      | Shanghai  | city       | 8  | 2 | 0 | 2 | 2 | 2 |
| <b>Li et al.1991</b>    | 1988      | Hubei     | city       | 8  | 2 | 0 | 2 | 2 | 2 |



|                         |           |              |            |   |   |   |   |   |   |
|-------------------------|-----------|--------------|------------|---|---|---|---|---|---|
| <b>Li et al.1997</b>    | 1995      | mainland     | China      | 9 | 2 | 1 | 2 | 2 | 2 |
| <b>Li et al.2007</b>    | 2006      | Fujian       | city       | 8 | 2 | 0 | 2 | 2 | 2 |
| <b>Li et al.2010a</b>   | 2008      | Fujian       | city       | 8 | 2 | 0 | 2 | 2 | 2 |
| <b>Li et al.2010b</b>   | 2008      | Tianjin      | provincial | 8 | 2 | 0 | 2 | 2 | 2 |
| <b>Li et al.2011</b>    | 2009      | Shanghai     | city       | 8 | 2 | 0 | 2 | 2 | 2 |
| <b>Li et al.2012</b>    | 2008~2011 | Shanghai     | provincial | 8 | 2 | 0 | 2 | 2 | 2 |
| <b>Li et al.2013a</b>   | 2011      | Hebei        | city       | 8 | 2 | 0 | 2 | 2 | 2 |
| <b>Li et al.2013b</b>   | 2012      | Shandong     | city       | 8 | 2 | 0 | 2 | 2 | 2 |
| <b>Li.1998</b>          | 1996      | Heilongjiang | city       | 7 | 2 | 0 | 2 | 2 | 1 |
| <b>Li.2001</b>          | 1988      | Jiangxi      | city       | 8 | 2 | 0 | 2 | 2 | 2 |
| <b>Li.2010</b>          | 2008      | Gansu        | city       | 8 | 2 | 0 | 2 | 2 | 2 |
| <b>Li.2012</b>          | 2011      | Tianjin      | city       | 9 | 2 | 0 | 2 | 2 | 2 |
| <b>Liang et al.2010</b> | 2009      | Guangdong    | city       | 7 | 2 | 0 | 2 | 2 | 1 |
| <b>Liang et al.2012</b> | 2011      | Guangdong    | city       | 8 | 2 | 0 | 2 | 2 | 2 |
| <b>Lin et al.2003</b>   | 2002      | Chongqing    | provincial | 8 | 2 | 0 | 2 | 2 | 2 |
| <b>Lin.2013</b>         | 2011      | Guangdong    | city       | 8 | 2 | 0 | 2 | 2 | 2 |
| <b>Liu et al.1998</b>   | 1996      | Guangdong    | provincial | 9 | 2 | 1 | 2 | 2 | 2 |

|                         |                |           |            |    |   |   |   |   |   |
|-------------------------|----------------|-----------|------------|----|---|---|---|---|---|
| <b>Liu et al.2005</b>   | 1990、1996、2001 | Ningxia   | city       | 8  | 2 | 0 | 2 | 2 | 2 |
| <b>Liu et al.2012a</b>  | 2012           | Ningxia   | city       | 8  | 2 | 0 | 2 | 2 | 2 |
| <b>Liu et al.2012b</b>  | 2011           | Sichuan   | provincial | 8  | 2 | 0 | 2 | 2 | 2 |
| <b>Liu.2009</b>         | 2008           | Sichuan   | city       | 8  | 2 | 0 | 2 | 2 | 2 |
| <b>Ma.1997</b>          | 1996           | Sichuan   | city       | 8  | 2 | 0 | 2 | 2 | 2 |
| <b>Mao et al.1997</b>   | 1995           | Zhejiang  | city       | 9  | 2 | 1 | 2 | 2 | 2 |
| <b>Mao et al.2011</b>   | 2010           | Sichuan   | city       | 7  | 2 | 0 | 2 | 2 | 1 |
| <b>Meng et al.2008</b>  | 2006           | Beijing   | city       | 8  | 2 | 0 | 2 | 2 | 2 |
| <b>NCOH.1998</b>        | 1995           | China     | China      | 10 | 2 | 2 | 2 | 2 | 2 |
| <b>NCOH.2009</b>        | 2005           | China     | China      | 10 | 2 | 2 | 2 | 2 | 2 |
| <b>Pei.2008</b>         | 2007           | Henan     | city       | 8  | 2 | 0 | 2 | 2 | 2 |
| <b>Peng et al.2001a</b> | 1997           | Guangdong | city       | 8  | 2 | 0 | 2 | 2 | 2 |
| <b>Peng et al.2001b</b> | 1998           | Zhejiang  | city       | 7  | 2 | 0 | 2 | 2 | 1 |
| <b>Peng.2001</b>        | 1998           | Zhejiang  | city       | 8  | 2 | 0 | 2 | 2 | 2 |
| <b>Quan.1992</b>        | 1990           | Hubei     | city       | 9  | 2 | 1 | 2 | 2 | 2 |
| <b>Sheng.2008</b>       | 2007           | Liaoning  | city       | 8  | 2 | 0 | 2 | 2 | 2 |
| <b>Shu et al.2000</b>   | 1996           | Shanghai  | city       | 8  | 2 | 0 | 2 | 2 | 2 |

|                         |      |                     |            |   |   |   |   |   |   |
|-------------------------|------|---------------------|------------|---|---|---|---|---|---|
| <b>Song et al.2011</b>  | 2008 | Shaanxi             | city       | 8 | 2 | 0 | 2 | 2 | 2 |
| <b>Tao.2010</b>         | 2007 | Anhui               | city       | 8 | 2 | 0 | 2 | 2 | 2 |
| <b>Tian et al.2009</b>  | 2005 | Hainan              | provincial | 9 | 2 | 1 | 2 | 2 | 2 |
| <b>Wang et al.1994</b>  | 1990 | Beijing、<br>Sichuan | provincial | 8 | 2 | 0 | 2 | 2 | 2 |
| <b>Wang et al.1998a</b> | 1996 | Shandong            | city       | 8 | 2 | 0 | 2 | 2 | 2 |
| <b>Wang et al.1998b</b> | 1996 | Shanghai            | city       | 8 | 2 | 0 | 2 | 2 | 2 |
| <b>Wang et al.2001</b>  | 1999 | Shandong            | city       | 8 | 2 | 0 | 2 | 2 | 2 |
| <b>Wang et al.2003</b>  | 2000 | Heilongjiang        | city       | 7 | 2 | 0 | 2 | 2 | 1 |
| <b>Wang et al.2010</b>  | 2008 | Zhejiang            | city       | 8 | 2 | 0 | 2 | 2 | 2 |
| <b>Wang et al.2011a</b> | 2008 | Hebei               | city       | 8 | 2 | 0 | 2 | 2 | 2 |
| <b>Wang et al.2011b</b> | 2009 | Zhejiang            | city       | 8 | 2 | 0 | 2 | 2 | 2 |
| <b>Wang.1989</b>        | 1988 | Henan               | city       | 8 | 2 | 0 | 2 | 2 | 2 |
| <b>Wei et al.2013</b>   | 2012 | Hubei               | city       | 8 | 2 | 0 | 2 | 2 | 2 |
| <b>Wen et al.2013</b>   | 2011 | Fujian              | city       | 8 | 2 | 0 | 2 | 2 | 2 |

|                         |           |           |            |    |   |   |   |   |   |
|-------------------------|-----------|-----------|------------|----|---|---|---|---|---|
| <b>Wu et al.1995</b>    | 1993      | Jiangsu   | city       | 8  | 2 | 0 | 2 | 2 | 2 |
| <b>Wu.2005</b>          | 2002      | Guangxi   | city       | 8  | 2 | 0 | 2 | 2 | 2 |
| <b>Xiao.2014</b>        | 2013      | Shanxi    | city       | 8  | 2 | 0 | 2 | 2 | 2 |
| <b>Xie et al. 2001</b>  | 2000      | Anhui     | city       | 8  | 2 | 0 | 2 | 2 | 2 |
| <b>Xing.1990</b>        | 1987      | Zhejiang  | provincial | 9  | 2 | 1 | 2 | 2 | 2 |
| <b>Xu et al.2010</b>    | 2009      | Xinjiang  | city       | 8  | 2 | 0 | 2 | 2 | 2 |
| <b>Xu et al.2013a</b>   | 2010      | Shanghai  | provincial | 7  | 2 | 0 | 2 | 1 | 2 |
| <b>Xu et al.2013b</b>   | 2010      | Shanghai  | provincial | 8  | 2 | 0 | 2 | 2 | 2 |
| <b>Xu.1995</b>          | 1994      | Guangdong | city       | 7  | 2 | 0 | 2 | 2 | 1 |
| <b>Xu.1998</b>          | 1994      | Fujian    | city       | 7  | 2 | 0 | 2 | 2 | 1 |
| <b>Xu.2012</b>          | 2010      | Shanghai  | provincial | 10 | 2 | 2 | 2 | 2 | 2 |
| <b>Xu.2013</b>          | 2011      | Sichuan   | city       | 9  | 2 | 1 | 2 | 2 | 2 |
| <b>Ye.2010</b>          | 2008      | Guangxi   | city       | 8  | 2 | 0 | 2 | 2 | 2 |
| <b>Ye et al.2003</b>    | 1991~2000 | Hubei     | city       | 8  | 2 | 0 | 2 | 2 | 2 |
| <b>Yu et al.2006</b>    | 2004      | Guizhou   | city       | 10 | 2 | 2 | 2 | 2 | 2 |
| <b>Yu.2010</b>          | 2009      | Zhejiang  | city       | 8  | 2 | 0 | 2 | 2 | 2 |
| <b>Zhang et al.2000</b> | 1995      | Shanghai  | provincial | 8  | 2 | 0 | 2 | 2 | 2 |

|                         |      |          |            |   |   |   |   |   |   |
|-------------------------|------|----------|------------|---|---|---|---|---|---|
| <b>Zhang et al.2004</b> | 2003 | Shanghai | provincial | 8 | 2 | 0 | 2 | 2 | 2 |
| <b>Zhang et al.2005</b> | 2000 | Liaoning | city       | 8 | 2 | 0 | 2 | 2 | 2 |
| <b>Zhang et al.2010</b> | 2009 | Gansu    | city       | 8 | 2 | 0 | 2 | 2 | 2 |
| <b>Zhang et al.2011</b> | 2008 | Shaanxi  | city       | 8 | 2 | 0 | 2 | 2 | 2 |
| <b>Zhao et al.2013</b>  | 2012 | Liaoning | city       | 9 | 2 | 1 | 2 | 2 | 2 |
| <b>Zhao.2000</b>        | 1999 | Gansu    | city       | 8 | 2 | 0 | 2 | 2 | 2 |
| <b>Zhao.2001</b>        | 1998 | Gansu    | provincial | 8 | 2 | 0 | 2 | 2 | 2 |
| <b>Zhong et al.2003</b> | 2001 | Henan    | provincial | 9 | 2 | 1 | 2 | 2 | 2 |
| <b>Zhong et al.2011</b> | 2010 | Shandong | city       | 8 | 2 | 0 | 2 | 2 | 2 |
| <b>Zhou et al.2004</b>  | 2002 | Beijing  | city       | 8 | 2 | 0 | 2 | 2 | 2 |
| <b>Zhu.2003</b>         | 1999 | Sichuan  | city       | 8 | 2 | 0 | 2 | 2 | 2 |
| <b>Zhu.2012</b>         | 2011 | Beijing  | city       | 8 | 2 | 0 | 2 | 2 | 2 |
| <b>Zuo et al.2011</b>   | 2010 | Xinjiang | city       | 8 | 2 | 0 | 2 | 2 | 2 |

**Table S3 | Tool for assessing the risk of bias**

| Bias type                                                 | Low risk (score=2)                                                                                                                                                                                                  | Moderate risk (score=1)                                                                                                                                                                                                                                                                                                                                            | High risk (score=0)                                                                                                                                                                                     |
|-----------------------------------------------------------|---------------------------------------------------------------------------------------------------------------------------------------------------------------------------------------------------------------------|--------------------------------------------------------------------------------------------------------------------------------------------------------------------------------------------------------------------------------------------------------------------------------------------------------------------------------------------------------------------|---------------------------------------------------------------------------------------------------------------------------------------------------------------------------------------------------------|
| Selection (sample population)                             | <ul style="list-style-type: none"> <li>● Consecutive unselected population;</li> <li>● Sample from general population not a select group;</li> <li>● Rationale for case and control selection explained.</li> </ul> | <ul style="list-style-type: none"> <li>● Sample selected from large population but selection criteria not defined;</li> <li>● Sample selection ambiguous but may be representative;</li> <li>● Eligibility criteria not explained;</li> <li>● Rationale for cases and controls not explained;</li> <li>● Analysis to adjust for sampling strategy bias.</li> </ul> | <ul style="list-style-type: none"> <li>● Sample selection ambiguous and sample unlikely to be representative;</li> <li>● Highly select population making it difficult to generalise finding.</li> </ul> |
| selection (sample size)                                   | <ul style="list-style-type: none"> <li>● sample size calculation conducted and adequate.</li> </ul>                                                                                                                 | <ul style="list-style-type: none"> <li>● Sample size calculation not performed but all eligible persons studied;</li> <li>● Sample size calculation performed and reasons for not meeting sample size given.</li> </ul>                                                                                                                                            | <ul style="list-style-type: none"> <li>● Sample size estimation unclear or only sub-sample studied.</li> </ul>                                                                                          |
| Selection (participation rate)                            | <ul style="list-style-type: none"> <li>● High participation rate (&gt;85%).</li> </ul>                                                                                                                              | <ul style="list-style-type: none"> <li>● Moderate participation rate (70–85%).</li> </ul>                                                                                                                                                                                                                                                                          | <ul style="list-style-type: none"> <li>● Low participation rate (&lt;70%).</li> </ul>                                                                                                                   |
| Performance bias (outcome assessment)                     | <ul style="list-style-type: none"> <li>● Diagnosis using consistent criteria and direct examination.</li> </ul>                                                                                                     | <ul style="list-style-type: none"> <li>● Assessment from hospital record or interviewer;</li> <li>● Assessment from administrative database or register.</li> </ul>                                                                                                                                                                                                | <ul style="list-style-type: none"> <li>● Assessment from non-validated data or generic estimate from overall population.</li> </ul>                                                                     |
| Performance bias (analytical methods to control for bias) | <ul style="list-style-type: none"> <li>● Analysis appropriate for type of sample (subgroup analysis/regression etc.).</li> </ul>                                                                                    | <ul style="list-style-type: none"> <li>● Analysis does not account for common adjustment.</li> </ul>                                                                                                                                                                                                                                                               | <ul style="list-style-type: none"> <li>● Data confusing.</li> </ul>                                                                                                                                     |

**Figure S1. Funnel plots for studies**



FigS1a. Funnel plot for studies of ECC prevalence



FigS1b. Funnel plot for studies of ECC care index

## Checklist S1. PRISMA Checklist

| Section/<br>topic         | #  | Checklist item                                                                                                                                                                                                                                                                                              | Reported section #                                         |
|---------------------------|----|-------------------------------------------------------------------------------------------------------------------------------------------------------------------------------------------------------------------------------------------------------------------------------------------------------------|------------------------------------------------------------|
| <b>TITLE</b>              |    |                                                                                                                                                                                                                                                                                                             |                                                            |
| Title                     | 1  | Identify the report as a systematic review, meta-analysis, or both.                                                                                                                                                                                                                                         | Title                                                      |
| <b>ABSTRACT</b>           |    |                                                                                                                                                                                                                                                                                                             |                                                            |
| Structured summary        | 2  | Provide a structured summary including, as applicable: background; objectives; data sources; study eligibility criteria, participants, and interventions; study appraisal and synthesis methods; results; limitations; conclusions and implications of key findings; systematic review registration number. | Abstract                                                   |
| <b>INTRODUCTION</b>       |    |                                                                                                                                                                                                                                                                                                             |                                                            |
| Rationale                 | 3  | Describe the rationale for the review in the context of what is already known.                                                                                                                                                                                                                              | Background – 1 <sup>st</sup> to 3 <sup>rd</sup> paragraphs |
| Objectives                | 4  | Provide an explicit statement of questions being addressed with reference to participants, interventions, comparisons, outcomes, and study design (PICOS).                                                                                                                                                  | Background – 4 <sup>th</sup> paragraph                     |
| <b>METHODS</b>            |    |                                                                                                                                                                                                                                                                                                             |                                                            |
| Protocol and registration | 5  | Indicate if a review protocol exists, if and where it can be accessed (e.g., Web address), and, if available, provide registration information including registration number.                                                                                                                               | N/A                                                        |
| Eligibility criteria      | 6  | Specify study characteristics (e.g., PICOS, length of follow-up) and report characteristics (e.g., years considered, language, publication status) used as criteria for eligibility, giving rationale.                                                                                                      | Methods – Selection criteria                               |
| Information sources       | 7  | Describe all information sources (e.g., databases with dates of coverage, contact with study authors to identify additional studies) in the search and date last searched.                                                                                                                                  | Methods – Search strategy                                  |
| Search                    | 8  | Present full electronic search strategy for at least one database, including any limits used, such that it could be repeated.                                                                                                                                                                               | Methods – Search strategy                                  |
| Study selection           | 9  | State the process for selecting studies (i.e., screening, eligibility, included in systematic review, and, if applicable, included in the meta-analysis).                                                                                                                                                   | Methods – Selection criteria                               |
| Data collection process   | 10 | Describe method of data extraction from reports (e.g., piloted forms, independently, in duplicate) and any processes for obtaining and confirming data from                                                                                                                                                 | Methods – Data extraction                                  |



|                                    |    |                                                                                                                                                                                                                        |                                                              |
|------------------------------------|----|------------------------------------------------------------------------------------------------------------------------------------------------------------------------------------------------------------------------|--------------------------------------------------------------|
|                                    |    | investigators.                                                                                                                                                                                                         |                                                              |
| Data items                         | 11 | List and define all variables for which data were sought (e.g., PICOS, funding sources) and any assumptions and simplifications made.                                                                                  | Methods – Selection criteria, Data extraction                |
| Risk of bias in individual studies | 12 | Describe methods used for assessing risk of bias of individual studies (including specification of whether this was done at the study or outcome level), and how this information is to be used in any data synthesis. | Methods – Quality assessment, Table S3                       |
| Summary measures                   | 13 | State the principal summary measures (e.g., risk ratio, difference in means).                                                                                                                                          | Methods – Data extraction, Statistical analysis              |
| Synthesis of results               | 14 | Describe the methods of handling data and combining results of studies, if done, including measures of consistency (e.g., $I^2$ ) for each meta-analysis.                                                              | Methods – Statistical analysis                               |
| Risk of bias across studies        | 15 | Specify any assessment of risk of bias that may affect the cumulative evidence (e.g., publication bias, selective reporting within studies).                                                                           | Methods – Statistical analysis                               |
| Additional analyses                | 16 | Describe methods of additional analyses (e.g., sensitivity or subgroup analyses, meta-regression), if done, indicating which were pre-specified.                                                                       | Methods – Statistical analysis                               |
| <b>RESULTS</b>                     |    |                                                                                                                                                                                                                        |                                                              |
| Study selection                    | 17 | Give numbers of studies screened, assessed for eligibility, and included in the review, with reasons for exclusions at each stage, ideally with a flow diagram.                                                        | Figure 1                                                     |
| Study characteristics              | 18 | For each study, present characteristics for which data were extracted (e.g., study size, PICOS, follow-up period) and provide the citations.                                                                           | Results – Literature search and quality assessment, Table S1 |
| Risk of bias within studies        | 19 | Present data on risk of bias of each study and, if available, any outcome level assessment (see item 12).                                                                                                              | Results – Literature search and quality scores, Table S1, S2 |
| Results of individual studies      | 20 | For all outcomes considered (benefits or harms), present, for each study: (a) simple summary data for each intervention group (b) effect estimates and confidence intervals, ideally with a forest plot.               | Figure 2-8                                                   |
| Synthesis of results               | 21 | Present results of each meta-analysis done, including confidence intervals and measures of consistency.                                                                                                                | Table 1, 2                                                   |
| Risk of bias across studies        | 22 | Present results of any assessment of risk of bias across studies (see Item 15).                                                                                                                                        | Results – Literature search and quality assessment           |

|                     |    |                                                                                                                                                                                      |                                                                                  |
|---------------------|----|--------------------------------------------------------------------------------------------------------------------------------------------------------------------------------------|----------------------------------------------------------------------------------|
| Additional analysis | 23 | Give results of additional analyses, if done (e.g., sensitivity or subgroup analyses, meta-regression [see Item 16]).                                                                | Results-Prevalence of ECC in mainland China, Care index of ECC in mainland China |
| <b>DISCUSSION</b>   |    |                                                                                                                                                                                      |                                                                                  |
| Summary of evidence | 24 | Summarize the main findings including the strength of evidence for each main outcome; consider their relevance to key groups (e.g., healthcare providers, users, and policy makers). | Discussion – 1 <sup>st</sup> to 6 <sup>th</sup> paragraphs                       |
| Limitations         | 25 | Discuss limitations at study and outcome level (e.g., risk of bias), and at review-level (e.g., incomplete retrieval of identified research, reporting bias).                        | Discussion – 7 <sup>th</sup> paragraph                                           |
| Conclusions         | 26 | Provide a general interpretation of the results in the context of other evidence, and implications for future research.                                                              | Discussion – 8 <sup>th</sup> paragraph                                           |
| <b>FUNDING</b>      |    |                                                                                                                                                                                      |                                                                                  |
| Funding             | 27 | Describe sources of funding for the systematic review and other support (e.g., supply of data); role of funders for the systematic review.                                           | Acknowledgements                                                                 |

## References

1. Cai, W., Jiang, B.F. & Zhang, L.H. Survey of caries in native and non-native children located in Changning district of Shanghai. *Stomatology* **33**, 190-191 (2013).
2. Chen, C.B., Chen, H.Q. & Xing, C.Q. Caries survey report of 2354 2~6 year-old children in Sanya. *Maternal and Child Health Care of Chin* **23**, 4330-4332 (2008).
3. Chen, H.Q. 1866 preschool children's prevalence of dental caries in Sanya. *Maternal and Child Health Care of Chin* **20**, 2825-2826 (2009).
4. Cheng, J., Wei, S., Wang, J. & Song, D.D. The status of malnutrition among the children aged 2~5 years old and the effect factors. *Maternal and Child Health Care of Chin* **26**, 2160-2162 (2011).
5. Chen, S.X., Zhang, Y., Song, S.D., Zhang, Y.N. & Ou, Y. The comparison of people's oral health between rural and urban areas. *Acad J Guangdong Pharm Coll* **8**, 39-43 (1992).
6. Cheng, R.B., Zhang, X.F., Zhang, Y., Pan, L. & Tao, W. An epidemiological investigation of deciduous dental caries among 5375 preschool children aged between 3 to 6 years in Shenyang city. *Shanghai J Stomatol* **15**, 596-600 (2006).
7. Chen, M., Peng, S., Zheng, J. & Jiang, J.L. Survey of caries and distribution for 1160 children from 4 to 6 years old in Ningbo city. *Chin Mod Doc* **46**, 58,112 (2008).
8. Deng, Z.F., Guo, J.L. & Xu, S.S. Investigation of 2956 children's caries in Changsha. *Pract Prev Med* **5**, 241-242 (1998).
9. Du, M., Luo, Y., Zeng, X., Alkhatib, N. & Bedi, R. Caries in preschool children and its risk factors in 2 provinces in China. *Quintessence Int* **38**, 143-151 (2007).

10. Fan, W.H., Huang, S.H., Zheng, Z., Chen, W.C. & Zhang, H.C. 2008 Guangzhou children deciduous caries epidemiological survey. *J Dental Prev Treating* **18**, 127-130 (2010).
11. Feng, Y. *et al.* Fujian 5-year-old children's oral health epidemiological survey report. *J Fujian Med Univ* **38**, 87-90 (2004).
12. Feng, H. & Cai, W. 5 year-old children's caries survey report in Changning district of Shanghai. *Shanghai J Prev Med* **25**, 99-100 (2013).
13. Gao, Y.M., Han, X.L. & Yan, Y.C. The current situation of five-year-old children's caries and thier parents' oral ideas. *Acta Univ Med Anhui* **44**, 120-123 (2009).
14. Gao, S.M., Li, H.Q. & Kong, D.Q. Shijiazhuang rural plains caries survey reprot. *Hebei Med J* **31**, 1823-1824 (2009).
15. Gao, X., Xu, Y.H. & XU, P.R. Survey on health status of preschool children in Urumqi. *Maternal and Child Health Care of Chin* **21**, 3007-3009 (2010).
16. Dong, G.X., Gao, M. & Ma, C. Survey report of preschool children's caries in Laiwu. *J of Community Med* **11**, 56-57 (2013).
17. Gou, Q.Y., Zhou, Q., Zhou, W.L., Jiang, X.Q. & Liu, L. Survey on dental caries among 3804 preschool children in Chongqing. *Maternal and Child Health Care of Chin* **25**, 2854-2855 (2010).
18. Hu, Q.Y. *et al.* Caries survey report of 1773 children in Zhengzhou. *J Henan Med Coll* **26**, 371-373 (1991).
19. Hu, Q.G. & Ren, C. Kingdergarden's children's oral health survey result in Wuxi. *Chin J of Pract Stomatol* **1**, 249 (2008).
20. Hu, D.X. Analysis on dental caries of preschool children in Tongling. *Chin J of Gen Pract* **4**, 598-599 (2013).
21. Jiang, Y., Han, X.L., Zhang, L. & Yan, Y.C. Sampling and cause analysis of five-year age groups deciduous caries prevalence and treatment needs in Anhui. *Acta Univ Med Anhui* **37**, 237-240 (2002).
22. Jiang, H. & Wang, X.Y. Investigation and analysis of children's caries and oral health in Weinan. *Chin J Child Health Care* **20**, 474-475 (2012).
23. Le, S.X. *et al.* 1112 children's oral health report in Shanghai. *Stomatology* **12**, 172-174 (1992).
24. Li, Y.L. & Huang, J.M. Investigation of deciduous dental caries in preschool children in Shashi. *Hubei J Prev Med* **2**, 13-14,48 (1991).
25. Li, H., Yan, G.F. & Zhang, X. A comparative study on the incidence of dental caries of children 0~7 years in the urban and suburban rural areas of 9 cities of China. *Chin J Child Health Care* **5**, 213-215 (1997).
26. Li, R.Z., Su, R.Z. & He, Q. The investigation of caries of 1760 children aged from 2 to 7 years old in Xiamen. *Sci of travel Med* **13**, 41-42 (2007).
27. Li, Y. *et al.* Associations of social and behavioural factors with early childhood caries in Xiamen city in China. *Int J Paediatr Dent* **21**, 103-111 (2011).
28. Li, Z. & Liu, E.Q. 15490 3~6 year-old children's oral health investigation in Tianjing. *Maternal and Child Health Care of Chin* **25**, 2410-2411 (2010).
29. Li, Y.L., Du, Q. & Mao, X.Y. The epidemiological investigation into dental caries among the 5 years old in Shanghai suburban area. *Chin J of Pract Stomatol* **4**, 413-415 (2011).
30. Li, C.R., Zeng, X.L., Wang, X., Xu, W. & Chen, X. Analysis of caries status among 5-year-old children in Shanghai from 2008 to 2011. *Shanghai J Stomatol* **21**, 451-454 (2012).

31. Li, Y., Wang, L., Dong, Q. & Chen, H.W. 3~6 year-old children's caries epidemiological analysis in Tangshan. *Hebei Med J* **35**, 922 (2013).
32. Li, H., Li, A.Z., Wang, J.X. & Jiang, Y.F. The present situation of five-year-old children's caries in Linyi city and its relevant factors. *J of Shandong Med Coll* **35**, 444-447 (2013).
33. Li, M.B. 1100 preschool children's caries survey report in Jiamusi. *Heilongjiang Med and Pharm* **21**, 77-78 (1998).
34. Li, X.Q. 1234 children's caries survey report in Nanchang city. *Mod Diagn Treat* **50**, 40 (2001).
35. Li, X.Q. Dental caries among children aged 4 to 6 investigation and analysis in Dingxi city. *Chin Pediatr of Integr Tradi West Med* **2**, 191-192 (2010).
36. Li, H. 3-5 years old children caries epidemiological analysis. *Harbin Med J* **32**, 32 (2012).
37. Liang, M.P., Li, M.Q., Li, W.Z., Chen, X.N. & Jiang, Y. Investigation and analysis of caries in Maoming kindergarten children aged 3-5. *Guide of Chin Med* **8**, 71-72 (2010).
38. Liang, C.M., Zhao, X.G., Rong, L.H., Feng, C.Z. & Li, J.F. Analysis of preschool children's caries in Jiangmen district. *Chin J Child Health Care* **20**, 761-762 (2012).
39. Lin, J.H. *et al.* Dental caries in children and adolescents of Chongqing. *J of Chongqing Med Univ* **28**, 775-777,786 (2003).
40. Lin, Q.X. Analysis of caries condition and influence factors in preschool children. *Chin Med Pharm* **3**, 75-76 (2013).
41. Liu, J.W. *et al.* Survey Result of 5~6 year-old children's caries in Guangdong Province. *J Dent Prev Treating* **6**, 12 (1998).
42. Lu, Y., Chen, D.M., Jiang, Y. & Huang, H.R. Study of dental caries prevalence in children of Yinchuan in China. *West China J Stomatol* **23**, 502-504 (2005).
43. Liu, Y., Wu, M., Zhang, X.L. & Duan, X.J. Yinchuan 5-year-old children deciduous teeth caries disease and related influence factors of investigation and analysis. *Harbin Med J* **32**, 421-424 (2012).
44. Liu, J., Li, X., Hu, D., Zhang, X. & He, S. Caries status of primary and permanent teeth among 6-year-old children in Sichuan province and their correlation. *West China J Stomatol* **30**, 214-216, 220 (2012).
45. Liu, J. Analysis of the related factors on deciduous dental caries in preschool children. *Chin J of Clinical Rational Drug Use* **2**, 29-31 (2009).
46. Ma, Y. Survey of 4072 Children's caries in Chengdu. *Chengdu Med* **23**, 171-172 (1997).
47. Mao, L.B. *et al.* Ningbo urban and rural residents caries epidemiology. *Mod Pract Med* **9**, 4-6 (1997).
48. Mao, K.Q. & Yang, Y.B. Sample survey on health of children aged 0~6 years old in Xichang city. *Maternal and Child Health Care of Chin* **26**, 4852-4854 (2011).
49. Meng, J. *et al.* Oral examination quality analysis of Beijing kindergarten children in rural areas. *Maternal and Child Health Care of Chin* **23**, 236-237 (2008).
50. NCOH. *Second national epideiological survey suvey of oral health* (ed Qi, J.)132-134 (People's Medical Publishing House, Beijing, 1998).
51. NCOH. *Third national epideiological survey suvey of oral health* (ed Qi, X.Q.) 60 (People's Medical Publishing House, Beijing, 2008).
52. Pei, R. Survey of preschool children's oral health in Zhengzhou. *J of Med Forum* **29**, 34-35 (2008).

53. Peng, J. *et al.* Epidemiological features of dental caries among children and adolescent in Shenzhen. *Chin Tropical Med* **1**, 263-264 (2001).
54. Peng, C.M., Chen, H., Deng, S.L. & Peng, H. 832 3-year-old child development, nutrition and dental caries survey. *Zhejiang Prev Med* **13**, 26-27 (2001).
55. Peng, H. 3-year old children's caries investigation in Hangzhou. *Zhejiang Prev Med* **13**, 27 (2001).
56. Quan, X.H. & Liu, K.J. Investigation and analysis of caries among 598 children aged 2 to 5. *J of Mod Stomatol* **6**, 162-163 (1992).
57. Sheng, A. 4-6 years old children's oral health survey and discuss prevention strategies in Benxi City. *J of Mod Med and health* **24**, 1568-1569 (2008).
58. Shu, C.B., Feng, X.P. & Pan, Y. Investigation of deciduous teeth caries in children under 14-year-old. *Shanghai J Stomatol* **9**, 175-177 (2000).
59. Song, K.M., Yu, G.X., Zhang, F., Li, J.J. & you, S.X. Survey of dental caries incidence in 412 children aged three to five years in Xi'an city. *Chin J Conserv Dent* **21**, 101-102,109 (2011).
60. M., T.G. 5 years old Children's deciduous caries Investigation and Analysis in Tongling. *J of Tongling Vocat and Tech Coll* **1**, 4-5 (2010).
61. Tian, Y.G., Liao, T.A., Xie, Q., Zhao, X.L. & Xing, K.C. Caries prevalence among residents of Hainan province. *Chin Pub Health* **25**, 1125-1126 (2009).
62. Wang, H. *et al.* Epidemiological studies of children caries in Beijing, Leshan, HongKong and Japan. *J Beijing Med Univ* **26**, 209-212 (1994).
63. Wang, W.Y., Fu, P. & Yu, S.Y. Caries investigation of preschool children in Qingdao. *Litera and Inf On Prev Med* **4**, 193 (1998).
64. Wang, S.M., Fu, F.H., Cui, H.W., Lv, Y.M. & Zhang, J.L. Investigation of urban children's oral health. *J of Chin School Health* **19**, 94,96 (1998).
65. Wang, W.Y., Li, X.H. & He, Y.F. Caries survey report of preschool children in Qingdao. *J Improving Birth Outcome Child Develop Chin* **12**, 139-140 (2001).
66. Wang, Q., Zhao, Z.J. & Yin, F.C. 568 preschool children's oral health and caries survey report in Mudanjiang. *J of Mudanjiang Med coll* **24**, 15-16 (2003).
67. Wang, W.Q., Jing, C. & Wang, H.H. Dental caries and oral health behavior of 5-year-old children in Hangzhou city. *Stomatology* **30**, 749-750 (2010).
68. Wang, Q.C. & Wang, C.X. 2~6 year-old preschool children's caries survey report in Tangshan. *Maternal and Child Health Care of Chin* **26**, 3119-3120 (2011).
69. Wang, S.H., Zhu, S., Chen, J.P., Zhang, X. & Jiang, F. An analysis of correlative factors of deciduous teeth caries in preschool children. *Zhejiang Prev Med* **23**, 5-8 (2011).
70. Wang, X.Y. & Shi, A.M. Caries survey among children in Zhengzhou aged 3 to 6. *J Appl Clin Pediatr* **4**, 368-371 (1989).
71. Wei, Y.H., Wang, F. & Xu, W. Investigation of preschool children's caries. *J Clin Stomatol* **29**, 681-682 (2013).
72. Wen, Y.J. *et al.* Analysis of five-year-olds caries status and related factors in Ningde city of Fujian Province. *Chin J Prim Med Pharm* **20**, 3589-3591 (2013).
73. Wu, S.Y., Yu, J. & Xu, D.N. Epidemiological survey of 10491 children's oral health in Changzhou city. *Stomatology* **15**, 100-101 (1995).
74. Wu, W., Zeng, X.J. & Huang, H. Survey result of 3~5 year-old children's caries in Nanning, Guangxi province. *J of Mod Stomatol* **19**, 407 (2005).

75. Xiao, Y. Investigation of preschool children's caries. *For all Health* **8**, 295 (2014).
76. Xie, X.M. 567 preschool children aged 3 to 7 deciduous caries survey. *Acta Univ Med Anhui* **36**, 321 (2001).
77. Xing, X.L., Wu, J.C., Jin, G.R., Zheng, K.H. & Zhu, Q.Z. Investigation of 12286 children's caries. *J of Zhejiang Med Univ* **19**, 280-282 (1990).
78. Xu, Y.H., Li, Y.P. & Chen, C.H. Karamay city preschool children's health collective survey. *World Health Digest Med Periodical* **7**, 376-377 (2010).
79. Xu, S.T., Cao, X.M., Feng, J.Q., Li, C.R. & Song, Y. Analysis of early childhood caries and risk factors in 2 year-old children in Shanghai. *J Dental Prev Treating* **21**, 301-304 (2013).
80. Cao, X.M., Xu, S.T., Feng, J.Q., Dong, H.W. & Li, C.R. Status of early childhood caries of 3 year-old children in Shanghai. *J Dent Prev Treating* **18**, 643-646 (2010).
81. Xu, Y.C. 1051 preschool children's caries survey result in Jieyang city. *J Dent Prev Treating* **3**, 54 (1995).
82. Xu, M.Y. Investigation of the incidence of dental caries in preschool children. *Chin J Child Health Care* **6**, 217 (1998).
83. Xu, W. Risk Factors for Dental Caries in 3 -year-old and 6-year-old Children in Shanghai with the Preventive Strategies Research. *Fudan Univ J* **5**, 20-25(2012).
84. Xu, B.Q., Wen, X.Y. & Guo, H.J. Investigation of dental caries of 5-year-old children and their parents' oral hygienic knowledge and behavior in Mianyang. *Maternal and Child Health Care of Chin* **23**, 3815-3817 (2013).
85. Ye, Y. Survey result of 3~6 year-old children's caries in Guigang, Guangxi province. *National Med Front of Chin* **5**, 96 (2010).
86. Ye, Y., Li, P. & Li, X.T. Shiyang City caries in preschool children 10 years of observation. *Chin J Child Health Care* **11**, 141-142 (2003).
87. Yu, X.Y. & Ma, L.X. Guiyang 5-year-old child deciduous caries sample survey report. *Guizhou Med J* **30**, 659-660 (2006).
88. Yu, J. 3~6 year-old children's caries survey result in Hangzhou. *Zhejiang Prev Med* **22**, 67,70 (2010).
89. Zhang, J., Wei, M. & Zhang, Y. Caries investigation of children in Shanghai below 7 and its trend in 10 years. *Shanghai J Prev Med* **12**, 385-386 (2000).
90. Zhang, J.M., Zhu, J.F. & Lu, Y.P. Investigation and treatment of dental caries in preschool children. *Anthology of Med* **23**, 428-430 (2004).
91. Zhang, X.F., Xu, X.B., Cheng, R.B. & Pan, L. Study of caries polarization in 2-5 year-old children of Shenyang, China. *West China J Stomatol* **23**, 258-259 (2005).
92. Zhang, C.Y. & Zhang, Y.F. Preschoolers physical development trends, characteristics and status dynamic analysis. *Health Vocat Edu* **28**, 100-101 (2010).
93. Zhang, P., Yang, T.F. & Li, Y.Q. 2626 children aged 2 to 6 's caries survey in Weinan. *Shaanxi Med J* **40**, 1372-1373 (2011).
94. Zhao, P.Y. *et al.* Status of caries of 3 year-old children in shenyang. *Chin Med Eng* **21**, 3-5 (2013).
95. Zhao, W.H. 5-year-old child deciduous caries sample survey report in Lanzhou. *Gansu Sci and Tech* **4**, 48 (2000).
96. Zhao, W.H. Caries investigation and analysis of urban and rural, poor areas in Gansu Province. *Chin J Conserv Dent* **11**, 121-122 (2001).

97. Zhong, Y., Yang, B.S. & He, J. Investigation of deciduous caries in preschool children in Henan. *Henan J Prev Med* **14**, 141-143 (2003).
98. Zhong, L.H. *et al.* Caries epidemiological investigation and analysis of children aged 3 to 4. *Guide of Chin Med* **9**, 79-80 (2011).
99. Zhou, H.L. *et al.* Statistics and analysis of Xicheng oral health survey. *Beijing J Stomatol* **12**, 160-162 (2004).
100. Zhu, Q.H. Caries investigation and analysis of rural children in Bazhong. *Chin Gen Pract* **6**, 137-138 (2003).
101. Zhu, Z.G. Caries survey analysis of preschool children in Changping area, Beijing City, 2011. *J of TCM Univ of Hunan* **32**, 67-68 (2012).
102. Zuo, Z.Y. & Chen, H. Investigation and analysis of preschool children's caries. *Chin and foreign Med Res* **9**, 73 (2011).
